# Supplementary material
Source: publisher figshare collection journal article supplement (https://springernature.figshare.com/ndownloader/files/10920503)
Supplement: Supplementary file 1 [file 10920503]

Source	Target	Type	Distance	Voltage	Lines
1	2	Undirected	20	220	2
2	3	Undirected	43	220	1
2	4	Undirected	165	220	2
4	5	Undirected	0	110	1
4	6	Undirected	0	110	1
4	7	Undirected	2.88	110	1
7	8	Undirected	0.8	11	2
4	9	Undirected	4.5	110	1
4	10	Undirected	28.75	110	1
4	11	Undirected	25.86	110	1
10	11	Undirected	37.495	110	2
11	12	Undirected	23	110	1
10	12	Undirected	26.5	110	1
13	4	Undirected	0.3	220	1
14	4	Undirected	75.76	220	1
14	15	Undirected	45.3	220	1
15	16	Undirected	30	220	1
4	16	Undirected	164	220	1
16	17	Undirected	0.08	220	1
16	18	Undirected	0.65	110	1
16	19	Undirected	68.5825	220	4
19	20	Undirected	27.025	220	4
19	21	Undirected	132.9	220	2
19	22	Undirected	35.7	110	2
22	23	Undirected	0	110	1
24	25	Undirected	21	110	1
19	26	Undirected	114.64	220	2
26	27	Undirected	92.44	220	2
27	28	Undirected	23.635	110	2
28	29	Undirected	67.24	110	2
30	31	Undirected	49.7	220	1
32	31	Undirected	26.7	220	1
31	33	Undirected	6.4	220	1
31	34	Undirected	0	66	1
31	35	Undirected	3.26	220	1
31	36	Undirected	78.14	220	2
29	37	Undirected	30.45	66	2
29	38	Undirected	40.505	110	2
38	39	Undirected	135.86	110	2
39	40	Undirected	49.82	110	1
40	36	Undirected	0.19	220	1
36	41	Undirected	7	220	1
36	42	Undirected	101.96	220	2
42	43	Undirected	29.86	220	2
43	44	Undirected	0	220	1
43	45	Undirected	0	220	1
43	46	Undirected	1.7	220	1
46	47	Undirected	0.2	110	1
46	48	Undirected	21.4	110	2
49	50	Undirected	26.6	220	1
50	51	Undirected	0	220	2
50	52	Undirected	0.73	220	2
42	53	Undirected	28.35	220	2
53	54	Undirected	2.2	110	2
42	55	Undirected	88.032	220	2
50	53	Undirected	1	220	2
54	56	Undirected	16.2	110	2
56	57	Undirected	13.8	110	2
56	58	Undirected	9.9	110	4
56	59	Undirected	14.38	66	2
60	57	Undirected	0.28	110	1
61	62	Undirected	14.91	110	2
63	62	Undirected	13.2	110	1
63	64	Undirected	0	66	1
63	65	Undirected	10.29	110	1
65	66	Undirected	11.47	110	2
66	67	Undirected	11	66	1
65	62	Undirected	21.88	110	1
67	65	Undirected	0.2	110	1
57	59	Undirected	0	66	1
57	68	Undirected	0	66	2
65	69	Undirected	21	220	1
70	71	Undirected	0	220	1
71	65	Undirected	31.21	220	1
71	55	Undirected	28.3	220	1
65	55	Undirected	39.45	220	1
53	55	Undirected	52.06	220	2
50	72	Undirected	34	220	2
72	73	Undirected	6.6	110	2
72	74	Undirected	4.3	110	1
73	75	Undirected	0.94	110	2
73	48	Undirected	14.1	110	2
76	77	Undirected	0	66	1
77	48	Undirected	0.27	110	2
48	78	Undirected	0.7	110	1
79	80	Undirected	9.01	220	1
80	81	Undirected	32.2	220	2
80	82	Undirected	12	220	2
81	83	Undirected	0	66	1
81	84	Undirected	0	66	1
83	85	Undirected	16.3	110	2
82	86	Undirected	40.7	220	2
55	87	Undirected	17.43	220	2
87	88	Undirected	13.86	220	2
55	89	Undirected	29.36	500	1
55	86	Undirected	77.2	500	1
89	86	Undirected	35.97	550	1
89	88	Undirected	19.85	220	2
89	90	Undirected	46.99	220	2
91	90	Undirected	58.7	220	2
88	92	Undirected	12.75	220	2
88	93	Undirected	0	110	2
93	94	Undirected	3.7715	110	2
95	94	Undirected	14.4	110	1
96	97	Undirected	0.53	110	2
97	92	Undirected	0	220	2
97	98	Undirected	1.46	110	2
99	100	Undirected	3.74	110	2
101	102	Undirected	0	110	2
101	103	Undirected	0	110	2
104	105	Undirected	7.73	110	2
93	106	Undirected	20.7	110	2
107	106	Undirected	18.9	110	2
107	57	Undirected	37.3	110	2
107	108	Undirected	0	110	1
107	109	Undirected	0	110	1
110	111	Undirected	0	110	1
110	112	Undirected	0	66	1
85	113	Undirected	8.76	110	2
111	113	Undirected	6.24	110	2
113	114	Undirected	8.6	110	1
114	115	Undirected	1.8	110	1
85	116	Undirected	35.3	110	2
117	116	Undirected	0	66	1
86	118	Undirected	0.206666666667	220	3
86	92	Undirected	24.895	220	4
119	120	Undirected	14.8	110	1
86	120	Undirected	0.38	220	2
121	120	Undirected	48.72	220	2
90	122	Undirected	25.6333333333	110	3
123	124	Undirected	1.1	66	1
125	123	Undirected	4.69	66	1
126	127	Undirected	23.09	110	1
128	127	Undirected	86.85	110	1
129	127	Undirected	0	66	1
129	130	Undirected	0.12	66	1
91	130	Undirected	0	220	3
91	127	Undirected	0.63	220	1
128	131	Undirected	7.82	66	1
86	123	Undirected	9.45	154	1
132	123	Undirected	34.41	154	1
132	86	Undirected	44.41	154	1
133	86	Undirected	260.32	500	4
134	86	Undirected	60.7	110	2
132	135	Undirected	9.29	154	2
135	136	Undirected	0	154	2
137	136	Undirected	12.8	66	1
138	139	Undirected	0.205	66	2
125	140	Undirected	13.86	66	1
141	140	Undirected	8.79	66	1
141	142	Undirected	2.23	66	1
138	142	Undirected	9.73	66	1
138	132	Undirected	10.5	154	2
134	143	Undirected	0	110	4
134	144	Undirected	27.9	110	2
145	144	Undirected	16.5	110	2
146	144	Undirected	0	66	1
146	147	Undirected	0	66	2
144	147	Undirected	0	66	2
134	147	Undirected	0	66	1
134	148	Undirected	0	110	1
144	148	Undirected	0	110	2
148	121	Undirected	16.2	220	2
149	121	Undirected	0.1	220	2
150	121	Undirected	214.4	220	2
151	134	Undirected	2.4	154	1
151	138	Undirected	11.13	154	1
152	138	Undirected	1.99	66	2
152	153	Undirected	7.28	66	1
154	155	Undirected	6.7	66	1
156	155	Undirected	11.12	66	1
154	157	Undirected	0.1	66	1
154	158	Undirected	13.6	66	1
156	159	Undirected	1.62	66	1
135	154	Undirected	34.72	154	2
160	154	Undirected	19.89	154	2
161	159	Undirected	5.22	66	1
161	156	Undirected	5.87	66	1
161	160	Undirected	2.3	154	1
162	160	Undirected	0	154	2
160	163	Undirected	38.15	154	2
164	163	Undirected	2.9	154	1
164	165	Undirected	0.23	66	1
166	163	Undirected	38.95	154	2
166	167	Undirected	22.82	66	2
167	168	Undirected	10.395	66	2
169	168	Undirected	9.1	66	2
169	170	Undirected	2.9	66	1
171	170	Undirected	13.54	66	1
171	169	Undirected	14.3	66	1
171	172	Undirected	26.8	66	1
171	166	Undirected	45.11	66	1
166	173	Undirected	103.33	154	1
174	175	Undirected	3.47	154	2
174	173	Undirected	13.44	154	1
166	133	Undirected	67.75	220	2
176	133	Undirected	206.36	500	2
133	177	Undirected	23	220	2
178	177	Undirected	12	220	2
177	179	Undirected	0	220	2
178	180	Undirected	12	220	1
178	181	Undirected	18.6	110	1
150	133	Undirected	0.17	220	1
150	182	Undirected	7.4	220	1
150	183	Undirected	3.6	66	1
184	183	Undirected	7.58	66	1
185	186	Undirected	0	66	1
187	186	Undirected	18	66	1
188	189	Undirected	14.71	66	1
190	188	Undirected	36.64	154	1
190	191	Undirected	16.94	66	1
191	192	Undirected	0	66	1
190	193	Undirected	61.72	154	1
194	193	Undirected	3.4	66	1
194	195	Undirected	1.99	66	1
196	195	Undirected	37.1	66	1
194	197	Undirected	2.33	66	1
193	197	Undirected	5.56	66	1
176	197	Undirected	61.04	154	1
198	197	Undirected	10.11	66	1
198	199	Undirected	8.49	66	1
193	176	Undirected	61.36	154	1
200	176	Undirected	23.91	66	1
176	201	Undirected	75.495	220	2
201	202	Undirected	8.28	66	1
203	202	Undirected	8.64	66	1
204	202	Undirected	3.8	66	1
205	201	Undirected	10.45	154	1
206	205	Undirected	5.49	154	2
206	207	Undirected	0	154	1
206	208	Undirected	25.62	220	1
206	176	Undirected	76.2	220	1
201	209	Undirected	3	66	1
210	209	Undirected	1.29	66	1
210	176	Undirected	4.379	66	1
209	203	Undirected	3.735	66	2
201	203	Undirected	0.0933333333333	154	3
211	212	Undirected	14.2	66	2
211	213	Undirected	10.87	66	1
213	214	Undirected	0	66	1
213	215	Undirected	0.89	66	1
216	212	Undirected	1.905	154	2
216	208	Undirected	3.45	154	1
217	208	Undirected	7.63	154	1
218	217	Undirected	0	66	1
217	219	Undirected	8.7	154	1
206	219	Undirected	8.99	154	1
176	208	Undirected	84	220	1
220	221	Undirected	0.78	66	1
222	221	Undirected	0	66	1
176	223	Undirected	74.3	220	2
176	224	Undirected	0	220	1
176	225	Undirected	0	220	1
176	226	Undirected	26.25	220	1
227	226	Undirected	104.53	220	1
227	228	Undirected	86.15	220	1
229	228	Undirected	23	220	1
176	228	Undirected	46.67	220	1
176	229	Undirected	67.46	220	2
230	229	Undirected	17.5	220	2
176	231	Undirected	141	220	2
232	231	Undirected	0.32	220	2
176	233	Undirected	44	220	1
234	233	Undirected	11.6	220	1
234	176	Undirected	55.6	220	1
234	235	Undirected	26	220	1
236	235	Undirected	10.5	220	1
227	237	Undirected	80.3	66	1
176	238	Undirected	68.17	220	2
176	239	Undirected	18.9	220	1
239	240	Undirected	17.8	220	1
176	241	Undirected	43.09	154	1
176	242	Undirected	84.54	154	1
176	243	Undirected	35.9	220	1
244	243	Undirected	29.8	220	1
176	245	Undirected	43.89	154	1
246	247	Undirected	29.3	66	1
248	249	Undirected	0.8	66	1
248	250	Undirected	11.9	66	1
251	250	Undirected	10.9	66	1
252	253	Undirected	0.1	220	1
254	253	Undirected	44.25	220	1
238	255	Undirected	41.6	220	2
238	256	Undirected	136.22	220	2
238	251	Undirected	3	220	2
256	257	Undirected	152	220	1
256	258	Undirected	118.38	220	1
257	258	Undirected	36.38	220	1
259	258	Undirected	1.8	220	1
251	260	Undirected	9.6425	66	4
261	262	Undirected	68.425	66	2
262	257	Undirected	38.4	66	1
263	257	Undirected	0	66	2
264	257	Undirected	0	220	1
265	266	Undirected	36.75	66	1
265	267	Undirected	5.7	66	3
265	268	Undirected	22.7	66	2
267	269	Undirected	0.15	220	1
257	269	Undirected	110.3	220	1
257	270	Undirected	107.6	220	1
271	270	Undirected	47	220	1
272	270	Undirected	109.7	220	1
269	273	Undirected	38.03	220	1
274	273	Undirected	6.32	110	1
275	273	Undirected	39.68	110	1
276	273	Undirected	44.42	110	1
276	277	Undirected	7	66	1
276	278	Undirected	7	66	1
269	272	Undirected	105.56	220	1
267	279	Undirected	0.76	66	1
280	279	Undirected	0	66	1
272	281	Undirected	0.19	220	2
282	281	Undirected	110.78	220	1
282	283	Undirected	0.2	220	1
284	283	Undirected	0	66	1
285	286	Undirected	57.29	110	1
272	287	Undirected	59.6	220	2
282	288	Undirected	32.65	110	1
227	245	Undirected	87.4	66	1
27	32	Undirected	135.26	220	1
162	289	Undirected	22	154	2
290	119	Undirected	32.74	110	1
243	253	Undirected	37.2	220	1
101	93	Undirected	4.76	110	2
28	291	Undirected	24.1	66	1
215	212	Undirected	7.93	66	1
124	86	Undirected	14.47	66	1
136	139	Undirected	12.32	66	2
292	286	Undirected	25.96	110	1
58	60	Undirected	25.2	110	2
65	70	Undirected	38.95	220	1
245	293	Undirected	12.1	154	1
282	292	Undirected	32.78	110	1
27	30	Undirected	112.16	220	1
239	251	Undirected	187.5	220	1
55	105	Undirected	50.313	220	2
126	294	Undirected	16.65	66	1
295	296	Undirected	5.5	66	1
221	212	Undirected	27.1	66	2
60	61	Undirected	30.39	110	2
46	49	Undirected	0	110	1
124	125	Undirected	7.19	66	1
123	297	Undirected	50.69	66	1
98	99	Undirected	3.51	110	2
85	298	Undirected	7.18	110	2
299	169	Undirected	18.82	66	1
111	82	Undirected	18.24	110	2
55	79	Undirected	69.76	220	2
95	290	Undirected	11.043	110	2
107	300	Undirected	21.37	110	1
82	301	Undirected	6.39	110	2
37	302	Undirected	37.97	66	2
266	267	Undirected	40.29	66	1
126	297	Undirected	33.26	66	1
172	303	Undirected	7	66	1
304	118	Undirected	17.05	110	2
100	101	Undirected	10.68	110	1
305	281	Undirected	13.62	110	1
306	247	Undirected	17.8	66	1
245	306	Undirected	28.43	66	1
205	307	Undirected	0	66	1
299	186	Undirected	75.13	66	1
19	27	Undirected	201.29	110	1
133	188	Undirected	37.22	66	1
61	59	Undirected	32.74	66	2
266	262	Undirected	56.1	66	1
260	261	Undirected	128.5	66	2
161	128	Undirected	81.68	66	1
4	308	Undirected	121.64	110	1
172	309	Undirected	9.1	66	1
279	281	Undirected	103.72	66	2
12	4	Undirected	48.2	110	1
54	75	Undirected	27.51	110	2
40	53	Undirected	130.57	110	1
164	166	Undirected	38.78	66	2
104	93	Undirected	19.35	110	2
75	77	Undirected	13.07	110	1
189	190	Undirected	22.14	66	1
166	174	Undirected	116.78	154	1
153	155	Undirected	29.61	66	1
16	310	Undirected	55	220	1
26	311	Undirected	0	66	1
66	312	Undirected	8	110	2
118	98	Undirected	20.79	110	2
191	193	Undirected	46.18	66	1
169	313	Undirected	24.15	66	1
314	295	Undirected	4.21	66	1
96	93	Undirected	10.43	110	2
210	211	Undirected	7.4	66	2
314	122	Undirected	28.7	66	2
154	159	Undirected	34.18	66	1
111	100	Undirected	16.93	110	2
111	304	Undirected	6.98	110	2
205	203	Undirected	14.572	154	1
46	54	Undirected	37.88	110	2
90	297	Undirected	4.53	110	1
126	129	Undirected	23.05	66	1
164	161	Undirected	35.47	66	1
31	315	Undirected	7.21	220	1
198	176	Undirected	45.32	66	1
221	316	Undirected	79.895	66	1
19	24	Undirected	15.85	110	1
72	314	Undirected	47.17	110	2
248	247	Undirected	95.9	66	1
299	188	Undirected	88.4	66	1
167	317	Undirected	68.16	66	1
301	105	Undirected	11.2	110	2
171	188	Undirected	42.48	154	1
231	318	Undirected	9	66	1
